# Supplementary material for: The Influence of Latent and Chronic Infection on Pathogen Persistence
Source: MDPI journal article supplement (doi:10.3390/math9091007), 2021-04-29
Supplement: s1 [file s1]

Archive with 1 entries (1 files):
- mathematics-1164872-supplementary.pdf
